# Supplementary material
Source: publisher figshare collection journal article supplement (https://gsajournals.figshare.com/ndownloader/files/18042929)
Supplement: Supplementary file 1 [file 18042929]

## Sheet: Lh14ONLY_MSEVSS_sptm_LbG1_table
TABLE S1: Lh 14 Proteins of the MSEV Superset
In-house Accession number	Class	Annotation	E-value	Signal Peptide	Transmembrane domain	Lb Accession number	Lb E-value	G1 Accession number	G1 E-value
GAJC01031099.1_25	Class 1	charged multivesicular body protein 6	4.45e-74	SP: N	TM: N	Lb: GGGI01014746.1	1.35e-89	G1: GAIW01000405.1	5.36e-87
GAJC01030581.1_43	Class 1	translocon-associated protein subunit beta	3.16e-99	SP: Y	TM: Y	Lb: GAJA01018646.1	1.46e-127	G1: GAIW01010586.1	8.88e-118
GAJC01030396.1_14	Class 1	mitochondrial pyruvate carrier 1	1.19e-47	SP: N	TM: Y	Lb: GGGI01010001.1	1.65e-58	G1: GAIW01013369.1	3.42e-57
GAJC01030130.1_52	Class 1	UDP-glucuronosyltransferase 1-9-like	0	SP: Y	TM: Y	Lb: GAJA01016209.1	0	G1: GAIW01022629.1	0
GAJC01030096.1_24	Class 1	serine/threonine-protein phosphatase Pgam5, mitochondrial	9.03e-132	SP: N	TM: N	Lb: GAJA01020341.1	2.72e-156	G1: GAIW01017059.1	3.07e-146
GAJC01029414.1_9	Class 1	MICOS complex subunit MIC27 isoform X2	6.18e-56	SP: N	TM: N	Lb: GAJA01006068.1	1.84e-107	G1: GAIW01015086.1	6.47e-95
GAJC01029363.1_47	Class 1	NADH dehydrogenase [ubiquinone] iron-sulfur protein 4, mitochondrial	6.23e-79	SP: N	TM: N	Lb: GGGI01013808.1	4.97e-122	G1: GAIW01012284.1	1.09e-101
GAJC01029325.1_93	Class 1	2-oxoglutarate dehydrogenase, mitochondrial isoform X5	0	SP: N	TM: N	Lb: GAJA01021055.1	0	G1: GAIW01010953.1	0
GAJC01029192.1_25	Class 1	ATP-binding cassette sub-family D member 3	0	SP: N	TM: Y	Lb: GGGI01009676.1	0	G1: GAIW01023990.1	0
GAJC01028989.1_23	Class 1	V-type proton ATPase subunit D	1.65e-155	SP: N	TM: N	Lb: GAJA01006659.1	3.91e-160	G1: GAIW01009663.1	4.35e-153
GAJC01028891.1_55	Class 1	dihydrolipoyllysine-residue succinyltransferase component of 2-oxoglutarate dehydrogenase complex, mitochondrial	0	SP: N	TM: N	Lb: GAJA01018274.1	0	G1: GAIW01024386.1	7.18e-165
GAJC01028693.1_7	Class 1	NADH dehydrogenase [ubiquinone] 1 beta subcomplex subunit 5, mitochondrial	5.31e-53	SP: N	TM: Y	Lb: GGGI01004311.1	1.02e-112	G1: GAIW01021519.1	2.11e-97
GAJC01028672.1_28	Class 1	50S ribosome-binding GTPase family protein	2.24e-37	SP: Y	TM: N	Lb: GGGI01011192.1	6.31e-54	G1: GAIW01014286.1	3.25e-61
GAJC01028414.1_19	Class 1	transmembrane and coiled-coil domain-containing protein 1	5.01e-113	SP: N	TM: Y	Lb: GAJA01002265.1	8.26e-116	G1: GAIW01016848.1	6.88e-108
GAJC01028343.1_20	Class 1	dolichyl-diphosphooligosaccharide--protein glycosyltransferase subunit STT3B isoform X1	0	SP: N	TM: Y	Lb: GGGI01008383.1	0	G1: GAIW01022553.1	0
GAJC01028170.1_18	Class 1	NADH dehydrogenase [ubiquinone] 1 beta subcomplex subunit 10	5.36e-65	SP: N	TM: N	Lb: GAJA01021073.1	3.53e-108	G1: GAIW01012941.1	2.77e-92
GAJC01028123.1_9	Class 1	V-type proton ATPase subunit d	0	SP: N	TM: N	Lb: GGGI01013268.1	0	G1: GAIW01012493.1	0
GAJC01027933.1_33	Class 1	putative OPA3-like protein CG13603	1.69e-93	SP: N	TM: N	Lb: GAJA01002259.1	2.33e-122	G1: GAIW01001023.1	3.02e-114
GAJC01027925.1_11	Class 1	isocitrate dehydrogenase [NAD] subunit beta, mitochondrial	0	SP: N	TM: N	Lb: GGGI01013012.1	0	G1: GAIW01011910.1	0
GAJC01027894.1_58	Class 1	NADH dehydrogenase [ubiquinone] flavoprotein 1, mitochondrial	0	SP: N	TM: N	Lb: GGGI01009154.1	0	G1: GAIW01015768.1	0
GAJC01027824.1_14	Class 1	electron transfer flavoprotein subunit alpha, mitochondrial	0	SP: N	TM: N	Lb: GGGI01012102.1	0	G1: GAIW01009654.1	0
GAJC01027799.1_61	Class 1	vesicle-trafficking protein SEC22b-B	6.22e-145	SP: N	TM: Y	Lb: GGGI01005551.1	4.15e-145	G1: GAIW01023671.1	7.91e-143
GAJC01027753.1_25	Class 1	lipase 3	1.26e-82	SP: Y	TM: N	Lb: GGGI01000557.1	5.59e-118	G1: GAIW01004976.1	8.42e-81
GAJC01027746.1_33	Class 1	50S ribosome-binding GTPase	1.91e-96	SP: Y	TM: N	Lb: GGGI01011192.1	1.07e-150	G1: GAIW01004263.1	3.54e-132
GAJC01027725.1_6	Class 1	ribonuclease Oy	2.24e-43	SP: Y	TM: N	Lb: GGGI01001485.1	1.17e-65	G1: GAIW01008755.1	6.02e-57
GAJC01027531.1_60	Class 1	protein disulfide-isomerase A6	0	SP: Y	TM: N	Lb: GGGI01008067.1	0	G1: GAIW01023592.1	0
GAJC01024852.1_14	Class 1	lysosomal alpha-mannosidase isoform X2	2.15e-78	SP: Y	TM: N	Lb: GAJA01012944.1	1.59e-86	G1: GAIW01019874.1	8.29e-85
GAJC01024725.1_36	Class 1	Trimeric intracellular cation channel type B	6.49e-178	SP: N	TM: Y	Lb: GAJA01012361.1	0	G1: GAIW01012694.1	4.31e-180
GAJC01022480.1_6	Class 1	thioredoxin domain-containing protein	3.89e-155	SP: Y	TM: Y	Lb: GAJA01008204.1	0	G1: GAIW01006128.1	4.86e-171
GAJC01022382.1_37	Class 1	sideroflexin-1	0	SP: N	TM: Y	Lb: GGGI01015284.1	0	G1: GAIW01006852.1	0
GAJC01021538.1_51	Class 1	trehalase-like	0	SP: Y	TM: N	Lb: GGGI01008526.1	0	G1: GAIW01010630.1	0
GAJC01021129.1_25	Class 1	paramyosin, long form-like	0	SP: N	TM: N	Lb: GAJA01000548.1	0	G1: GAIW01023112.1	0
GAJC01021107.1_29	Class 1	malectin-A	9.24e-138	SP: Y	TM: Y	Lb: GAJA01011987.1	6.92e-139	G1: GAIW01019098.1	1.12e-129
GAJC01020023.1_41	Class 1	sideroflexin-2	0	SP: N	TM: Y	N/A	N/A	N/A	N/A
GAJC01017999.1_17	Class 1	angiopoietin-1 receptor isoform X3	9.19e-05	SP: N	TM: Y	N/A	N/A	N/A	N/A
GAJC01017428.1_36	Class 1	major royal jelly protein 1	8.59e-135	SP: Y	TM: N	N/A	N/A	N/A	N/A
GAJC01017322.1_30	Class 1	sarcalumenin isoform X2	0	SP: Y	TM: N	N/A	N/A	N/A	N/A
GAJC01017199.1_29	Class 1	lipase 3-like	2.74e-75	SP: Y	TM: N	N/A	N/A	N/A	N/A
GAJC01017061.1_11	Class 1	endocuticle structural protein SgAbd-6-like	1.42e-43	SP: Y	TM: N	N/A	N/A	N/A	N/A
GAJC01016301.1_14	Class 1	60S ribosomal protein L13	1.52e-140	SP: N	TM: N	N/A	N/A	N/A	N/A
GAJC01013832.1_13	Class 1	60S ribosomal protein L4	0	SP: N	TM: N	N/A	N/A	N/A	N/A
GAJC01013802.1_37	Class 1	NADH-cytochrome b5 reductase 2 isoform X1	5.1e-169	SP: N	TM: Y	N/A	N/A	N/A	N/A
GAJC01013770.1_23	Class 1	cytochrome b-c1 complex subunit Rieske, mitochondrial	1.35e-126	SP: N	TM: N	N/A	N/A	N/A	N/A
GAJC01013702.1_11	Class 1	60S acidic ribosomal protein P0	0	SP: N	TM: N	N/A	N/A	N/A	N/A
GAJC01013642.1_14	Class 1	cytochrome P450 4g15-like	0	SP: N	TM: Y	N/A	N/A	N/A	N/A
GAJC01013595.1_37	Class 1	membrane-associated progesterone receptor component 1	2.13e-82	SP: N	TM: Y	N/A	N/A	N/A	N/A
GAJC01013539.1_20	Class 1	60S ribosomal protein L13a	4.14e-130	SP: N	TM: N	N/A	N/A	N/A	N/A
GAJC01013495.1_10	Class 1	cytochrome c1, heme protein, mitochondrial	4.42e-174	SP: N	TM: Y	N/A	N/A	N/A	N/A
GAJC01013427.1_7	Class 1	NADH-quinone oxidoreductase subunit B 2-like	1.68e-107	SP: N	TM: N	N/A	N/A	N/A	N/A
GAJC01013335.1_5	Class 1	NADH dehydrogenase [ubiquinone] 1 alpha subcomplex subunit 7-like	5.59e-34	SP: N	TM: N	N/A	N/A	N/A	N/A
GAJC01013333.1_21	Class 1	fatty acid-binding protein, muscle isoform X1	1.92e-65	SP: N	TM: N	N/A	N/A	N/A	N/A
GAJC01013300.1_83	Class 1	protein NipSnap	7.74e-178	SP: N	TM: N	N/A	N/A	N/A	N/A
GAJC01013291.1_59	Class 1	ATP synthase subunit b, mitochondrial	1.86e-92	SP: N	TM: Y	N/A	N/A	N/A	N/A
GAJC01013205.1_12	Class 1	60S ribosomal protein L23	1.02e-94	SP: N	TM: N	N/A	N/A	N/A	N/A
GAJC01013187.1_17	Class 1	NADH dehydrogenase [ubiquinone] 1 alpha subcomplex subunit 8	1.92e-48	SP: N	TM: N	N/A	N/A	N/A	N/A
GAJC01013185.1_14	Class 1	T-complex protein 1 subunit zeta	0	SP: N	TM: N	N/A	N/A	N/A	N/A
GAJC01013182.1_24	Class 1	60S ribosomal protein L5	0	SP: N	TM: N	N/A	N/A	N/A	N/A
GAJC01013160.1_30	Class 1	translocon-associated protein subunit alpha	1.92e-130	SP: Y	TM: Y	N/A	N/A	N/A	N/A
GAJC01013157.1_73	Class 1	Proline dehydrogenase 1, mitochondrial	0	SP: N	TM: N	N/A	N/A	N/A	N/A
GAJC01013138.1_9	Class 1	myosin regulatory light chain 2	1.12e-68	SP: N	TM: N	N/A	N/A	N/A	N/A
GAJC01013096.1_16	Class 1	ATP synthase subunit d, mitochondrial	6.89e-58	SP: N	TM: N	N/A	N/A	N/A	N/A
GAJC01012976.1_11	Class 1	RNA-binding protein squid-like	2.97e-122	SP: N	TM: N	N/A	N/A	N/A	N/A
GAJC01012952.1_13	Class 1	RNA-binding protein squid isoform X2	8.72e-109	SP: N	TM: N	N/A	N/A	N/A	N/A
GAJC01012897.1_26	Class 1	heat shock 70 kDa protein cognate 4	0	SP: N	TM: N	N/A	N/A	N/A	N/A
GAJC01012804.1_6	Class 1	cytochrome b5	3.96e-55	SP: N	TM: Y	N/A	N/A	N/A	N/A
GAJC01012771.1_15	Class 1	glutamine synthetase 2 cytoplasmic isoform X1	0	SP: N	TM: N	N/A	N/A	N/A	N/A
GAJC01012769.1_5	Class 1	NADH dehydrogenase [ubiquinone] 1 beta subcomplex subunit 8, mitochondrial	3.97e-25	SP: N	TM: Y	N/A	N/A	N/A	N/A
GAJC01012766.1_49	Class 1	annexin B9	0	SP: N	TM: N	N/A	N/A	N/A	N/A
GAJC01012746.1_16	Class 1	ATP synthase subunit g, mitochondrial	5.3e-39	SP: N	TM: N	N/A	N/A	N/A	N/A
GAJC01012689.1_23	Class 1	14-3-3 protein zeta isoform X1	1.48e-180	SP: N	TM: N	N/A	N/A	N/A	N/A
GAJC01012610.1_15	Class 1	50S ribosome-binding GTPase	3.3e-39	SP: Y	TM: N	N/A	N/A	N/A	N/A
GAJC01012565.1_23	Class 1	pyruvate kinase-like isoform X2	0	SP: N	TM: N	N/A	N/A	N/A	N/A
GAJC01012525.1_26	Class 1	50S ribosome-binding GTPase	3.7e-29	SP: Y	TM: N	N/A	N/A	N/A	N/A
GAJC01012524.1_31	Class 1	50S ribosome-binding GTPase	1.03e-32	SP: Y	TM: N	N/A	N/A	N/A	N/A
GAJC01012472.1_23	Class 1	ER membrane protein complex subunit 8/9 homolog	1.8e-100	SP: N	TM: N	N/A	N/A	N/A	N/A
GAJC01012412.1_24	Class 1	actin-5C	0	SP: N	TM: N	N/A	N/A	N/A	N/A
GAJC01012411.1_49	Class 1	actin, muscle	0	SP: N	TM: N	N/A	N/A	N/A	N/A
GAJC01012253.1_8	Class 1	cytochrome c oxidase subunit NDUFA4	1.24e-24	SP: N	TM: Y	N/A	N/A	N/A	N/A
GAJC01012249.1_18	Class 1	60S ribosomal protein L11	2.36e-118	SP: N	TM: N	N/A	N/A	N/A	N/A
GAJC01012240.1_36	Class 1	very long-chain-fatty-acid--CoA ligase bubblegum isoform X2	0	SP: N	TM: N	N/A	N/A	N/A	N/A
GAJC01012232.1_17	Class 1	malate dehydrogenase, cytoplasmic	7.29e-180	SP: N	TM: N	N/A	N/A	N/A	N/A
GAJC01012230.1_7	Class 1	60S ribosomal protein L14	1.04e-50	SP: N	TM: N	N/A	N/A	N/A	N/A
GAJC01012219.1_12	Class 1	very-long-chain 3-oxoacyl-CoA reductase	0	SP: N	TM: N	N/A	N/A	N/A	N/A
GAJC01012216.1_25	Class 1	60S ribosomal protein L10a	2.17e-96	SP: N	TM: N	N/A	N/A	N/A	N/A
GAJC01012184.1_54	Class 1	spectrin alpha chain isoform X1	0	SP: N	TM: N	N/A	N/A	N/A	N/A
GAJC01012155.1_9	Class 1	NADH dehydrogenase [ubiquinone] 1 alpha subcomplex subunit 13	7.83e-57	SP: N	TM: Y	N/A	N/A	N/A	N/A
GAJC01012150.1_20	Class 1	40S ribosomal protein S15Aa	2.44e-91	SP: N	TM: N	N/A	N/A	N/A	N/A
GAJC01012137.1_24	Class 1	myosin light chain alkali isoform X2	1e-85	SP: N	TM: N	N/A	N/A	N/A	N/A
GAJC01012129.1_15	Class 1	probable NADH dehydrogenase [ubiquinone] 1 alpha subcomplex subunit 12	2.38e-73	SP: N	TM: N	N/A	N/A	N/A	N/A
GAJC01012103.1_17	Class 1	farnesol dehydrogenase-like	2.01e-64	SP: N	TM: N	N/A	N/A	N/A	N/A
GAJC01012102.1_28	Class 1	farnesol dehydrogenase-like	6.21e-80	SP: N	TM: N	N/A	N/A	N/A	N/A
GAJC01012069.1_15	Class 1	40S ribosomal protein S10	4.02e-97	SP: N	TM: N	N/A	N/A	N/A	N/A
GAJC01012068.1_6	Class 1	cytochrome b-c1 complex subunit 7-like	8.94e-36	SP: N	TM: N	N/A	N/A	N/A	N/A
GAJC01011949.1_55	Class 1	mitochondrial 2-oxoglutarate/malate carrier protein-like	0	SP: N	TM: N	N/A	N/A	N/A	N/A
GAJC01011927.1_54	Class 1	putative ATP-dependent RNA helicase me31b	0	SP: N	TM: N	N/A	N/A	N/A	N/A
GAJC01011893.1_31	Class 1	cytochrome b5-like	2.76e-51	SP: N	TM: Y	N/A	N/A	N/A	N/A
GAJC01011807.1_10	Class 1	Protein disulfide-isomerase	0	SP: N	TM: N	N/A	N/A	N/A	N/A
GAJC01011782.1_10	Class 1	protein RER1	6.7e-102	SP: N	TM: Y	N/A	N/A	N/A	N/A
GAJC01011653.1_5	Class 1	myosin regulatory light chain 2	6.27e-66	SP: N	TM: N	N/A	N/A	N/A	N/A
GAJC01011619.1_22	Class 1	40S ribosomal protein S2	3.22e-146	SP: N	TM: N	N/A	N/A	N/A	N/A
GAJC01011605.1_14	Class 1	3-hydroxyacyl-CoA dehydrogenase type-2	5.73e-137	SP: N	TM: N	N/A	N/A	N/A	N/A
GAJC01011586.1_19	Class 1	leucine-rich repeat, immunoglobulin-like domain and transmembrane domain-containing protein 2	1.54e-11	SP: Y	TM: N	N/A	N/A	N/A	N/A
GAJC01011558.1_41	Class 1	dihydrolipoyl dehydrogenase, mitochondrial	0	SP: N	TM: N	N/A	N/A	N/A	N/A
GAJC01011550.1_14	Class 1	NADH-ubiquinone oxidoreductase 49 kDa subunit	0	SP: N	TM: N	N/A	N/A	N/A	N/A
GAJC01011454.1_14	Class 1	40S ribosomal protein S7	9.76e-110	SP: N	TM: N	N/A	N/A	N/A	N/A
GAJC01011419.1_7	Class 1	kielin/chordin-like protein	7.7e-27	SP: Y	TM: N	N/A	N/A	N/A	N/A
GAJC01011326.1_68	Class 1	MICOS complex subunit Mic60 isoform X1	0	SP: N	TM: N	N/A	N/A	N/A	N/A
GAJC01011277.1_17	Class 1	microsomal glutathione S-transferase 1-like	2.31e-71	SP: N	TM: Y	N/A	N/A	N/A	N/A
GAJC01011256.1_29	Class 1	peroxiredoxin-5, mitochondrial	4.57e-102	SP: N	TM: N	N/A	N/A	N/A	N/A
GAJC01011252.1_23	Class 1	40S ribosomal protein S4	0	SP: N	TM: N	N/A	N/A	N/A	N/A
GAJC01011236.1_30	Class 1	60S ribosomal protein L10	1.15e-154	SP: N	TM: N	N/A	N/A	N/A	N/A
GAJC01011232.1_6	Class 1	MICOS complex subunit MIC19	8.42e-52	SP: N	TM: N	N/A	N/A	N/A	N/A
GAJC01011192.1_150	Class 1	peroxiredoxin-6-like	1.08e-142	SP: N	TM: N	N/A	N/A	N/A	N/A
GAJC01011169.1_8	Class 1	NADH dehydrogenase [ubiquinone] flavoprotein 2, mitochondrial	4.3e-142	SP: N	TM: N	N/A	N/A	N/A	N/A
GAJC01011133.1_10	Class 1	calreticulin	0	SP: Y	TM: N	N/A	N/A	N/A	N/A
GAJC01011105.1_9	Class 1	mitochondrial import inner membrane translocase subunit TIM50-C-like	0	SP: N	TM: N	N/A	N/A	N/A	N/A
GAJC01011050.1_5	Class 1	60S ribosomal protein L36	4.17e-73	SP: N	TM: N	N/A	N/A	N/A	N/A
GAJC01011037.1_17	Class 1	40S ribosomal protein S8	4.32e-136	SP: N	TM: N	N/A	N/A	N/A	N/A
GAJC01011036.1_41	Class 1	tubulin beta-1 chain	0	SP: N	TM: N	N/A	N/A	N/A	N/A
GAJC01011006.1_24	Class 1	single-stranded DNA-binding protein, mitochondrial	3.18e-57	SP: N	TM: N	N/A	N/A	N/A	N/A
GAJC01010984.1_6	Class 1	troponin C	2.95e-97	SP: N	TM: N	N/A	N/A	N/A	N/A
GAJC01010915.1_9	Class 1	50S ribosome-binding GTPase	4.39e-33	SP: Y	TM: N	N/A	N/A	N/A	N/A
GAJC01010865.1_16	Class 1	plasminogen activator inhibitor 1 RNA-binding protein isoform X1	1.91e-79	SP: N	TM: N	N/A	N/A	N/A	N/A
GAJC01010822.1_3	Class 1	NADH dehydrogenase [ubiquinone] 1 beta subcomplex subunit 7	2.76e-27	SP: N	TM: N	N/A	N/A	N/A	N/A
GAJC01010807.1_12	Class 1	60S ribosomal protein L9	3.71e-133	SP: N	TM: N	N/A	N/A	N/A	N/A
GAJC01010760.1_13	Class 1	60S ribosomal protein L35a	5.1e-78	SP: N	TM: N	N/A	N/A	N/A	N/A
GAJC01010666.1_10	Class 1	ATP synthase-coupling factor 6, mitochondrial	6.08e-42	SP: N	TM: N	N/A	N/A	N/A	N/A
GAJC01010573.1_13	Class 1	very-long-chain (3R)-3-hydroxyacyl-CoA dehydratase 2	6.38e-103	SP: N	TM: Y	N/A	N/A	N/A	N/A
GAJC01010572.1_196	Class 1	protein bark beetle isoform X1	0	SP: N	TM: Y	N/A	N/A	N/A	N/A
GAJC01010488.1_72	Class 1	moesin/ezrin/radixin homolog 1 isoform X2	0	SP: N	TM: N	N/A	N/A	N/A	N/A
GAJC01010481.1_3	Class 1	cytochrome c oxidase subunit 5B, mitochondrial	7.75e-50	SP: N	TM: N	N/A	N/A	N/A	N/A
GAJC01010465.1_24	Class 1	spermine oxidase-like	1.34e-107	SP: Y	TM: N	N/A	N/A	N/A	N/A
GAJC01010390.1_9	Class 1	40S ribosomal protein S20	5.67e-78	SP: N	TM: N	N/A	N/A	N/A	N/A
GAJC01010319.1_30	Class 1	glyceraldehyde-3-phosphate dehydrogenase 2	0	SP: N	TM: N	N/A	N/A	N/A	N/A
GAJC01010280.1_48	Class 1	elongation factor 1-alpha	0	SP: N	TM: N	N/A	N/A	N/A	N/A
GAJC01010278.1_4	Class 1	CDGSH iron-sulfur domain-containing protein 2 homolog	1.94e-75	SP: N	TM: N	N/A	N/A	N/A	N/A
GAJC01010274.1_32	Class 1	50S ribosome-binding GTPase family protein	1.82e-38	SP: Y	TM: N	N/A	N/A	N/A	N/A
GAJC01010260.1_26	Class 1	cytochrome b-c1 complex subunit 8	3.34e-32	SP: N	TM: N	N/A	N/A	N/A	N/A
GAJC01010230.1_54	Class 1	myosin heavy chain, muscle isoform X2	0	SP: N	TM: N	N/A	N/A	N/A	N/A
GAJC01010173.1_113	Class 1	pyruvate carboxylase, mitochondrial isoform X1	0	SP: N	TM: N	N/A	N/A	N/A	N/A
GAJC01010142.1_8	Class 1	60S ribosomal protein L8	1.63e-168	SP: N	TM: N	N/A	N/A	N/A	N/A
GAJC01010139.1_45	Class 1	ATP synthase subunit e, mitochondrial	4.73e-17	SP: N	TM: N	N/A	N/A	N/A	N/A
GAJC01010058.1_13	Class 1	protein NPC2 homolog	6.9e-28	SP: Y	TM: N	N/A	N/A	N/A	N/A
GAJC01009987.1_9	Class 1	icarapin-like	2.39e-27	SP: Y	TM: N	N/A	N/A	N/A	N/A
GAJC01009972.1_32	Class 1	B-cell receptor-associated protein 31	1.52e-100	SP: N	TM: Y	N/A	N/A	N/A	N/A
GAJC01009958.1_42	Class 1	histone H2A.V	2.4e-66	SP: N	TM: N	N/A	N/A	N/A	N/A
GAJC01009924.1_35	Class 1	transmembrane emp24 domain-containing protein bai isoform X2	4.32e-101	SP: Y	TM: Y	N/A	N/A	N/A	N/A
GAJC01009895.1_5	Class 1	40S ribosomal protein S27	1.76e-55	SP: N	TM: N	N/A	N/A	N/A	N/A
GAJC01009838.1_20	Class 1	transmembrane protein 214-A	6.59e-81	SP: Y	TM: N	N/A	N/A	N/A	N/A
GAJC01009770.1_24	Class 1	60S ribosomal protein L24	5.34e-59	SP: N	TM: Y	N/A	N/A	N/A	N/A
GAJC01009754.1_11	Class 1	apolipophorin-III-like protein	1.12e-07	SP: Y	TM: N	N/A	N/A	N/A	N/A
GAJC01009730.1_31	Class 1	Tubulin alpha-1 chain	0	SP: N	TM: N	N/A	N/A	N/A	N/A
GAJC01009718.1_4	Class 1	general odorant-binding protein 56d-like	5.64e-50	SP: Y	TM: N	N/A	N/A	N/A	N/A
GAJC01009624.1_17	Class 1	acyl-CoA Delta(11) desaturase-like	0	SP: N	TM: Y	N/A	N/A	N/A	N/A
GAJC01009588.1_5	Class 1	Y-box factor homolog isoform X1	1.84e-64	SP: N	TM: N	N/A	N/A	N/A	N/A
GAJC01009568.1_14	Class 1	NADH dehydrogenase [ubiquinone] 1 beta subcomplex subunit 6	2.67e-53	SP: N	TM: N	N/A	N/A	N/A	N/A
GAJC01009563.1_35	Class 1	adenylate kinase	1.37e-153	SP: N	TM: N	N/A	N/A	N/A	N/A
GAJC01009552.1_6	Class 1	cytochrome c oxidase subunit 5A, mitochondrial	1.37e-69	SP: N	TM: N	N/A	N/A	N/A	N/A
GAJC01009529.1_21	Class 1	PDZ and LIM domain protein 3 isoform X2	1.68e-103	SP: N	TM: N	N/A	N/A	N/A	N/A
GAJC01009527.1_6	Class 1	muscle LIM protein 1 isoform X3	8.55e-46	SP: N	TM: N	N/A	N/A	N/A	N/A
GAJC01009482.1_8	Class 1	NADH dehydrogenase [ubiquinone] iron-sulfur protein 6, mitochondrial	2.62e-53	SP: N	TM: N	N/A	N/A	N/A	N/A
GAJC01009424.1_7	Class 1	succinate dehydrogenase [ubiquinone] iron-sulfur subunit, mitochondrial	0	SP: N	TM: N	N/A	N/A	N/A	N/A
GAJC01009366.1_63	Class 1	protein lethal(2)essential for life	1.02e-37	SP: N	TM: N	N/A	N/A	N/A	N/A
GAJC01009365.1_14	Class 1	60S ribosomal protein L22-like	7.36e-60	SP: N	TM: N	N/A	N/A	N/A	N/A
GAJC01009336.1_20	Class 1	asparagine synthetase [glutamine-hydrolyzing]	0	SP: N	TM: N	N/A	N/A	N/A	N/A
GAJC01009315.1_44	Class 1	alcohol dehydrogenase class-3	0	SP: N	TM: N	N/A	N/A	N/A	N/A
GAJC01009301.1_5	Class 1	muscle-specific protein 20	1.11e-121	SP: N	TM: N	N/A	N/A	N/A	N/A
GAJC01009290.1_24	Class 1	60S ribosomal protein L17	7.28e-123	SP: N	TM: N	N/A	N/A	N/A	N/A
GAJC01009288.1_7	Class 1	ubiquitin-like protein FUBI	6.09e-60	SP: N	TM: N	N/A	N/A	N/A	N/A
GAJC01009225.1_18	Class 1	sushi, von Willebrand factor type A, EGF and pentraxin domain-containing protein 1-like	8.08e-09	SP: Y	TM: N	N/A	N/A	N/A	N/A
GAJC01009190.1_6	Class 1	endoplasmin	1.34e-109	SP: Y	TM: N	N/A	N/A	N/A	N/A
GAJC01009175.1_28	Class 1	40S ribosomal protein S16	7.55e-96	SP: N	TM: N	N/A	N/A	N/A	N/A
GAJC01009175.1_13	Class 1	mitochondrial import inner membrane translocase subunit TIM14	1.75e-62	SP: N	TM: Y	N/A	N/A	N/A	N/A
GAJC01009149.1_50	Class 1	ATP synthase subunit O, mitochondrial	1.6e-113	SP: N	TM: N	N/A	N/A	N/A	N/A
GAJC01009149.1_29	Class 1	NADH dehydrogenase [ubiquinone] iron-sulfur protein 3, mitochondrial	3.11e-130	SP: N	TM: N	N/A	N/A	N/A	N/A
GAJC01008186.1_8	Class 1	40S ribosomal protein S15	1.78e-69	SP: N	TM: N	N/A	N/A	N/A	N/A
GAJC01007074.1_63	Class 1	sodium/potassium-transporting ATPase subunit beta-2	0	SP: N	TM: Y	N/A	N/A	N/A	N/A
GAJC01003958.1_11	Class 1	histone H4-like	2.06e-50	SP: N	TM: N	N/A	N/A	N/A	N/A
GAJC01003331.1_6	Class 1	60S ribosomal protein L12	1.02e-125	SP: N	TM: N	N/A	N/A	N/A	N/A
GAJC01002392.1_58	Class 1	electron transfer flavoprotein-ubiquinone oxidoreductase, mitochondrial isoform X1	0	SP: N	TM: N	N/A	N/A	N/A	N/A
GAJC01002381.1_6	Class 1	UPF0389 protein CG9231	4.39e-15	SP: N	TM: Y	N/A	N/A	N/A	N/A
GAJC01001939.1_7	Class 1	neural/ectodermal development factor IMP-L2 isoform X3	5.29e-50	SP: N	TM: N	N/A	N/A	N/A	N/A
GAJC01029468.1_54	Class 2	A disintegrin and metalloproteinase with thrombospondin motifs 8 isoform X1	2.5e-47	SP: Y	TM: N	Lb: GGGI01003289.1	8.78e-71	G1: GAIW01006143.1	6.76e-41
GAJC01028852.1_18	Class 2	enhancing factor (viral)	6.02e-05	SP: Y	TM: N	Lb: GAJA01019749.1	5.74e-157	G1: GAIW01026852.1	2.04e-66
GAJC01027751.1_9	Class 2	rho GTPase-activating protein 9 isoform X1	2.9e-16	SP: N	TM: N	Lb: GGGI01016314.1	2.52e-06	N/A	N/A
GAJC01021576.1_36	Class 2	ATP-binding protein	2.82e-44	SP: Y	TM: N	Lb: GGGI01011192.1	5.63e-51	G1: GAIW01014286.1	5.05e-59
GAJC01020722.1_12	Class 2	neprilysin isoform X1	4.8e-18	SP: N	TM: N	Lb: GAJA01013720.1	1.16e-26	G1: GAIW01009606.1	4.8e-11
GAJC01020720.1_15	Class 2	endothelin-converting enzyme 1 isoform X1	2.3e-33	SP: N	TM: N	Lb: GAJA01013720.1	3.25e-53	G1: GAIW01009100.1	4.31e-24
GAJC01020718.1_27	Class 2	membrane metallo-endopeptidase-like 1 isoform X1	3.53e-19	SP: Y	TM: N	Lb: GAJA01008052.1	4.28e-16	G1: GAIW01008281.1	1.93e-15
GAJC01018250.1_20	Class 2	GTPase RsgA	1.01e-28	SP: N	TM: N	N/A	N/A	N/A	N/A
GAJC01018015.1_12	Class 2	Endothelin-converting enzyme 1	7.56e-06	SP: Y	TM: N	N/A	N/A	N/A	N/A
GAJC01013610.1_18	Class 2	endothelin-converting enzyme 1 isoform X1	9.01e-16	SP: Y	TM: N	N/A	N/A	N/A	N/A
GAJC01012383.1_11	Class 2	lysosomal aspartic protease	0	SP: Y	TM: N	N/A	N/A	N/A	N/A
GAJC01010415.1_14	Class 2	protein Diedel-like	1.77e-07	SP: Y	TM: N	N/A	N/A	N/A	N/A
GAJC01010126.1_52	Class 2	ras-related protein Rab-11A	8.51e-159	SP: N	TM: N	N/A	N/A	N/A	N/A
GAJC01030678.1_22	Class 3	---NA---	N/A	SP: Y	TM: N	N/A	N/A	N/A	N/A
GAJC01029385.1_87	Class 3	Macrophage receptor MARCO	3.41e-20	SP: Y	TM: N	Lb: GGGI01000204.1	9.42e-28	G1: GAIW01000379.1	2.68e-11
GAJC01029271.1_8	Class 3	---NA---	N/A	SP: N	TM: N	N/A	N/A	N/A	N/A
GAJC01028966.1_1	Class 3	---NA---	N/A	SP: N	TM: N	N/A	N/A	N/A	N/A
GAJC01027902.1_6	Class 3	---NA---	N/A	SP: Y	TM: N	N/A	N/A	N/A	N/A
GAJC01027679.1_5	Class 3	---NA---	N/A	SP: N	TM: N	Lb: GAJA01012767.1	3.13e-11	N/A	N/A
GAJC01027678.1_12	Class 3	---NA---	N/A	SP: N	TM: N	Lb: GGGI01000916.1	4.11e-14	N/A	N/A
GAJC01027452.1_12	Class 3	---NA---	N/A	SP: N	TM: N	N/A	N/A	N/A	N/A
GAJC01027372.1_5	Class 3	---NA---	N/A	SP: Y	TM: N	N/A	N/A	N/A	N/A
GAJC01027336.1_3	Class 3	---NA---	N/A	SP: Y	TM: N	N/A	N/A	N/A	N/A
GAJC01024744.1_6	Class 3	---NA---	N/A	SP: Y	TM: N	N/A	N/A	N/A	N/A
GAJC01024743.1_12	Class 3	---NA---	N/A	SP: N	TM: N	N/A	N/A	N/A	N/A
GAJC01023574.1_5	Class 3	---NA---	N/A	SP: N	TM: N	N/A	N/A	N/A	N/A
GAJC01021659.1_29	Class 3	---NA---	N/A	SP: Y	TM: N	N/A	N/A	N/A	N/A
GAJC01021632.1_11	Class 3	---NA---	N/A	SP: Y	TM: N	N/A	N/A	N/A	N/A
GAJC01017940.1_12	Class 3	---NA---	N/A	SP: N	TM: Y	N/A	N/A	N/A	N/A
GAJC01017287.1_25	Class 3	---NA---	N/A	SP: N	TM: N	N/A	N/A	N/A	N/A
GAJC01017051.1_6	Class 3	---NA---	N/A	SP: N	TM: N	N/A	N/A	N/A	N/A
GAJC01013355.1_10	Class 3	---NA---	N/A	SP: N	TM: Y	N/A	N/A	N/A	N/A
GAJC01012558.1_12	Class 3	---NA---	N/A	SP: N	TM: N	N/A	N/A	N/A	N/A
GAJC01012408.1_7	Class 3	PREDICTED: uncharacterized protein LOC107188865	1.24e-50	SP: N	TM: Y	N/A	N/A	N/A	N/A
GAJC01011873.1_7	Class 3	---NA---	N/A	SP: Y	TM: N	N/A	N/A	N/A	N/A
GAJC01011863.1_13	Class 3	---NA---	N/A	SP: Y	TM: N	N/A	N/A	N/A	N/A
GAJC01011465.1_5	Class 3	---NA---	N/A	SP: Y	TM: N	N/A	N/A	N/A	N/A
GAJC01011463.1_48	Class 3	---NA---	N/A	SP: Y	TM: N	N/A	N/A	N/A	N/A
GAJC01011457.1_12	Class 3	signal recognition particle receptor subunit alpha-like protein	1.01e-24	SP: N	TM: Y	N/A	N/A	N/A	N/A
GAJC01011137.1_32	Class 3	---NA---	N/A	SP: Y	TM: N	N/A	N/A	N/A	N/A
GAJC01011097.1_122	Class 3	---NA---	N/A	SP: Y	TM: N	N/A	N/A	N/A	N/A
GAJC01010930.1_16	Class 3	---NA---	N/A	SP: N	TM: Y	N/A	N/A	N/A	N/A
GAJC01010444.1_106	Class 3	hypothetical protein TSAR_010554	1.14e-08	SP: N	TM: N	N/A	N/A	N/A	N/A
GAJC01010353.1_14	Class 3	---NA---	N/A	SP: Y	TM: N	N/A	N/A	N/A	N/A
GAJC01010250.1_8	Class 3	hypothetical protein SINV_10737, partial	4.18e-76	SP: N	TM: N	N/A	N/A	N/A	N/A
GAJC01010050.1_21	Class 3	---NA---	N/A	SP: N	TM: Y	N/A	N/A	N/A	N/A
GAJC01009713.1_25	Class 3	---NA---	N/A	SP: N	TM: N	N/A	N/A	N/A	N/A
GAJC01009493.1_4	Class 3	---NA---	N/A	SP: Y	TM: N	N/A	N/A	N/A	N/A
GAJC01009363.1_49	Class 3	uncharacterized protein LOC107274787	2.19e-11	SP: Y	TM: N	N/A	N/A	N/A	N/A
GAJC01009309.1_26	Class 3	---NA---	N/A	SP: Y	TM: N	N/A	N/A	N/A	N/A
GAJC01007489.1_11	Class 3	---NA---	N/A	SP: Y	TM: N	N/A	N/A	N/A	N/A
GAJC01007380.1_16	Class 3	---NA---	N/A	SP: N	TM: N	N/A	N/A	N/A	N/A
GAJC01006038.1_15	Class 3	---NA---	N/A	SP: Y	TM: N	N/A	N/A	N/A	N/A
GAJC01005406.1_20	Class 3	---NA---	N/A	SP: N	TM: N	N/A	N/A	N/A	N/A
GAJC01003173.1_5	Class 3	---NA---	N/A	SP: N	TM: N	N/A	N/A	N/A	N/A
GAJC01002124.1_43	Class 3	---NA---	N/A	SP: N	TM: N	N/A	N/A	N/A	N/A
GAJC01001115.1_93	Class 3	---NA---	N/A	SP: N	TM: N	N/A	N/A	N/A	N/A
GAJC01000654.1_10	Class 3	---NA---	N/A	SP: N	TM: N	N/A	N/A	N/A	N/A
GAJC01000653.1_18	Class 3	---NA---	N/A	SP: N	TM: N	N/A	N/A	N/A	N/A
GAJC01000527.1_1	Class 3	---NA---	N/A	SP: N	TM: N	N/A	N/A	N/A	N/A
GAJC01000524.1_2	Class 3	---NA---	N/A	SP: N	TM: N	N/A	N/A	N/A	N/A
GAJC01000367.1_14	Class 3	---NA---	N/A	SP: N	TM: Y	N/A	N/A	N/A	N/A
GAJC01000363.1_6	Class 3	---NA---	N/A	SP: N	TM: N	N/A	N/A	N/A	N/A
GAJC01000213.1_10	Class 3	---NA---	N/A	SP: N	TM: N	N/A	N/A	N/A	N/A
Table S1: Lh 14 Proteins of the MSEV Superset. 246 proteins were annotated using BLAST2GO prior to sorting into classes and additional analysis. Table indicates in-house query accession number, class, annotation, E-value for best BLASTp hit during annotation, presence/absence of signal peptide or transmembrane domain, and presence/absence in L. boulardi (Lb) or G. hookeri (G1) transcriptomes with…
